# Supplementary material for: Catalytic alkene cyclohydroamination via an imido mechanism
Source: Royal Society of Chemistry journal article supplement (doi:10.1039/b718373a), 2008-01-01
Supplement: b718373a.pdf [file b718373a.pdf]

# Catalytic Alkene Cyclohydroamination via an Imido Mechanism

Andrew L. Gott, Adam J. Clarke, Guy J. Clarkson and Peter Scott\*

Department of Chemistry, University of Warwick, Gibbet Hill Road, Coventry CV4 7AL,  
UK.

## Supplementary Information

|    |                                       |
|----|---------------------------------------|
| 2  | General Considerations                |
| 3  | Complex Synthesis                     |
| 10 | Hydroamination Procedure              |
| 10 | Determination of Enantioselectivities |
| 11 | Kinetic Studies                       |
| 12 | X-Ray Crystallography                 |
| 16 | References                            |

**General Considerations.** All manipulations were conducted using standard inert-atmosphere techniques using a dual-manifold argon/vacuum Schlenk line or an MBraun LabStar glove box. All glassware and cannulae were stored in an oven at  $>373$  K. Solvents were (where necessary) pre-dried over sodium wire and then refluxed under nitrogen from an appropriate drying agent – toluene from sodium; pentane and diethyl ether from NaK alloy – stored in glass ampoules, and rigorously degassed before use.  $C_6D_6$  and toluene- $d_8$  were refluxed *in vacuo* for 3 days over potassium metal and vacuum transferred before use.  $C_6D_5Br$  was dried similarly from  $CaH_2$ .  $CDCl_3$  was purchased from Aldrich and stored over 4Å molecular sieves.

The salicyloxazoline proligands (*S*)- $HL^n$  ( $n = 1-2$ ),<sup>1</sup>  $Cp^*Zr(NMe_2)_3$ ,<sup>2</sup>  $Cp^*Zr(NH^tBu)_3$ ,<sup>3</sup> and  $Zr(NMe_2)_4$ <sup>4</sup> were prepared according to published procedures.  $LiNMe_2$  (99.9 % grade) was purchased from Chemat Technology and used as received. The hydroamination substrates 1-amino-2,2-dimethylpent-4-ene **I**<sup>5</sup> and 1-amino-2,2-dimethylamino-hex-5-ene **II**<sup>6</sup> were prepared according to literature procedures, dried for 3 days at ambient temperature over  $CaH_2$ , vacuum transferred and stored in the glovebox. 1-amino-2,2-dimethylpent-4-ene- $d_2$  was prepared *via* a variation of the literature method,<sup>7</sup> using diethyl ether rather than dichloromethane as solvent. (*R*)-(-)- $\alpha$ -methoxy- $\alpha$ -(trifluoromethyl)phenylacetyl chloride was purchased from Acros Organics and used as received. Celite was purchased from Aldrich and stored in an oven at  $>150^\circ C$  prior to use.

NMR spectra were recorded on Bruker DPX300 and DPX400 spectrometers. Routine NMR assignments were confirmed by  $^1H$ - $^1H$  (COSY) and  $^{13}C$ - $^1H$  (HMQC) correlation experiments where necessary. Elemental analyses were obtained by Warwick Analytical

Services, Coventry, UK and MEDAC Ltd, Surrey, UK. Mass Spectra were recorded on a VG Autospec Mass Spectrometer by the Department of Chemistry Mass Spectrometry Service, University of Warwick.

### Complex Synthesis

**(*S*<sub>Zr</sub>,*S*<sub>C</sub>)-[Cp\**L*<sup>1</sup>Zr(NMe<sub>2</sub>)<sub>2</sub>] 1.** A Schlenk tube was charged with Cp\*Zr(NMe<sub>2</sub>)<sub>3</sub> (0.300 g, 0.80 mmol) and (*S*)-HL<sup>1</sup> (0.294 g, 0.80 mmol). Diethyl ether (10 mL) was added and the reaction stirred at ambient temperature for 1 hour, whereupon all volatiles were removed *in vacuo*. The resulting yellow solid was crystallised from the minimum amount (*ca.* 2 mL) of pentane at -30°C. Yield 0.075 g (0.11 mmol, 14 %). <sup>1</sup>H NMR (400 MHz, C<sub>6</sub>D<sub>6</sub>, 298 K): δ 1.36 ppm (s, 9H, CMe<sub>3</sub>), 1.78 (s, 9H, CMe<sub>3</sub>), 1.93 (s, 15H, C<sub>5</sub>Me<sub>5</sub>), 2.43 (s, 6H, Zr-NMe<sub>2</sub>), 3.28 (s, 6H, Zr-NMe<sub>2</sub>), 3.69 (d of d, 1H, OCH<sub>2</sub> oxazoline, <sup>2</sup>J<sub>HH</sub> = 11 Hz, <sup>3</sup>J<sub>HH</sub> = 8 Hz), 4.05 (t, 1H, OCH<sub>2</sub> oxazoline, <sup>3</sup>J<sub>HH</sub> = 8 Hz), 4.85 (d of d, 1H, NCHPh oxazoline, <sup>2</sup>J<sub>HH</sub> = 11 Hz, <sup>3</sup>J<sub>HH</sub> = 8 Hz), 6.74 - 6.77 (m, 2H, Ar C-H of oxazoline Ph), 6.88 - 6.91 (m, 3H, Ar C-H of oxazoline Ph), 7.82 (d, 1H, Ar C-H, <sup>4</sup>J<sub>HH</sub> = 2 Hz), 8.17 (d, 1H, Ar C-H, <sup>4</sup>J<sub>HH</sub> = 2 Hz). <sup>13</sup>C{<sup>1</sup>H} NMR (100.6 MHz, C<sub>6</sub>D<sub>6</sub>, 298 K): δ 11.4 ppm (C<sub>5</sub>Me<sub>5</sub>), 30.9, 31.7 (both CMe<sub>3</sub>), 34.3, 36.0 (both CMe<sub>3</sub>), 43.2, 48.1 (both Zr-NMe<sub>2</sub>), 70.5 (NCHPh oxazoline), 74.7 (OCH<sub>2</sub> oxazoline), 112.3 (Ar C<sub>q</sub>), 119.0 (C<sub>5</sub>Me<sub>5</sub>), 124.0, 125.9, 128.3, 128.9, 130.6 (all Ar C-H), 138.0, 140.4, 143.2, 166.0 (all Ar C<sub>q</sub>), 170.9 (C<sub>q</sub> oxazoline). Anal. Calcd for C<sub>37</sub>H<sub>55</sub>N<sub>3</sub>O<sub>2</sub>Zr: C, 66.82; H, 8.34; N, 6.32. Found: C, 66.73; H, 8.51; N, 5.84. MS (EI +ve): *m/z* 619 [M<sup>+</sup> - NMe<sub>2</sub>], 575 [M<sup>+</sup> - 2 NMe<sub>2</sub>].

**(*S*<sub>Zr</sub>,*S*<sub>C</sub>)-[Cp\**L*<sup>2</sup>Zr(NMe<sub>2</sub>)<sub>2</sub>] 2.** A J. Young ampoule was charged with Cp\*Zr(NMe<sub>2</sub>)<sub>3</sub> (0.260 g, 0.71 mmol) and (*S*)-HL<sup>2</sup> (0.250 g, 0.71 mmol). Toluene (5 mL) was added, and the resulting yellow solution heated to 60°C for 3 days. The reaction vessel was allowed to cool to ambient temperature and all volatiles were removed *in vacuo*. The yellow oily residue was dissolved in pentane and dried *in vacuo* to remove residual toluene, and then crystallised from 2 mL of pentane at -30°C to yield the title compound as a crystalline yellow solid. Further material was obtained by concentration of the supernatant. Yield 0.198 g (0.31 mmol, 43 %). VT NMR studies gave evidence of restricted rotation of the amido units, and at low temperatures two rotamers were observed. Unusual orientations of the amido units are also noted in the molecular structure from X-ray diffraction. <sup>1</sup>H NMR (500 MHz, toluene-*d*<sub>8</sub>, 243 K); major rotamer (70%): δ 0.63 ppm (s, 9H, CMe<sub>3</sub> oxazoline), 1.35 (s, 9H, CMe<sub>3</sub>), 1.70 (s, 9H, CMe<sub>3</sub>), 1.84 (s, 15H, C<sub>5</sub>Me<sub>5</sub>), 3.01 (s, 6H, Zr-NMe<sub>2</sub>), 3.40 (s, 6H, Zr-NMe<sub>2</sub>), 3.56 (t, 1H, OCH<sub>2</sub>, oxazoline, <sup>2</sup>J<sub>HH</sub> = 9 Hz), 3.87 (d, 1H, NCH<sup>t</sup>Bu oxazoline, <sup>3</sup>J<sub>HH</sub> = 7 Hz), 3.96 (d, 1H, OCH<sub>2</sub>, oxazoline, <sup>2</sup>J<sub>HH</sub> = 9 Hz), 7.74 (d, 1H, Ar C-H, <sup>4</sup>J<sub>HH</sub> = 2 Hz), 7.97 (d, 1H, Ar C-H, <sup>4</sup>J<sub>HH</sub> = 2 Hz). Minor rotamer: δ 0.93 ppm (s, 9H, CMe<sub>3</sub> oxazoline), 1.34 (s, 9H, CMe<sub>3</sub>), 1.72 (s, 9H, CMe<sub>3</sub>), 1.92 (s, 15H, C<sub>5</sub>Me<sub>5</sub>), 2.84 (s, 6H, Zr-NMe<sub>2</sub>), 3.16 (s, 6H, Zr-NMe<sub>2</sub>), 3.62 (d, 1H, OCH<sub>2</sub> oxazoline, <sup>2</sup>J<sub>HH</sub> = 9 Hz), 4.00 (t, 1H, NCH<sup>t</sup>Bu oxazoline, <sup>2</sup>J<sub>HH</sub> = 9 Hz), 4.81 (d, 1H, OCH<sub>2</sub> oxazoline, <sup>3</sup>J<sub>HH</sub> = 7 Hz), 7.74 (d, 1H, Ar C-H, <sup>4</sup>J<sub>HH</sub> = 2 Hz), 8.65 (d, 1H, Ar C-H, <sup>4</sup>J<sub>HH</sub> = 2 Hz). <sup>13</sup>C{<sup>1</sup>H} NMR (125.8 MHz, toluene-*d*<sub>8</sub>, 243 K); major rotamer δ 11.8 ppm (C<sub>5</sub>Me<sub>5</sub>), 25.3 (CMe<sub>3</sub> oxazoline), 30.3, 31.5 (both CMe<sub>3</sub>), 34.2, 35.2, 35.8 (all CMe<sub>3</sub>), 47.0, 50.2 (both Zr-NMe<sub>2</sub>), 68.0 (NCH<sup>t</sup>Bu oxazoline), 71.2 (OCH<sub>2</sub> oxazoline), 111.8 (Ar C<sub>q</sub>), 119.8 (C<sub>5</sub>Me<sub>5</sub>), 122.5, 129.3 (both Ar C-H) 136.9, 139.9, 167.3 (all Ar C<sub>q</sub>), 170.7 (C<sub>q</sub> oxazoline). Minor

rotamer (30%):  $\delta$  11.2 ppm ( $C_5Me_5$ ), 26.0 ( $CMe_3$  oxazoline), 30.5, 31.4 (both  $CMe_3$ ), 33.6, 35.7, 36.3 (all  $CMe_3$ ), 41.8, 47.4 (both Zr-NMe<sub>2</sub>), 70.8 (NCH<sup>t</sup>Bu oxazoline), 73.2 (OCH<sub>2</sub> oxazoline), 115.4 (Ar C<sub>q</sub>), 118.8 ( $C_5Me_5$ ), 126.6, 129.0 (both Ar C-H), 138.9, 139.4, 161.1 (all Ar C<sub>q</sub>), 163.0 (C<sub>q</sub> oxazoline). Anal. Calcd for C<sub>35</sub>H<sub>59</sub>N<sub>3</sub>O<sub>2</sub>Zr: C, 65.17; H, 9.22; N, 6.51. Found: C, 64.78; H, 9.06; N, 6.17. MS (EI +ve):  $m/z$  599 [ $M^+$  - NMe<sub>2</sub>], 555 [ $M^+$  - 2 NMe<sub>2</sub>].

**(S<sub>Zr</sub>,S<sub>C</sub>)-[Cp\*<sup>L</sup>Zr(NH<sup>t</sup>Bu)] 3.** A J. Young ampoule was charged with Cp\*Zr(NH<sup>t</sup>Bu)<sub>3</sub> (0.400 g, 0.90 mmol) and (S)-HL<sup>1</sup> (0.380 g, 1.20 mmol). Toluene (5 mL) was added and the yellow solution heated to reflux for 3 days whereupon the reaction vessel was allowed to cool to ambient temperature. All volatiles were removed *in vacuo* and the residue transferred to a sublimation tube with the aid of 5 mL of pentane. The crude compound was sublimed at 235°C and 10<sup>-6</sup> mm Hg. Yield 0.152 g (0.23 mmol, 26 %). <sup>1</sup>H NMR (400 MHz, C<sub>6</sub>D<sub>6</sub>, 298 K):  $\delta$  1.28 ppm (s, 9H,  $CMe_3$ ), 1.30 (s, 9H,  $CMe_3$ ), 1.74 (s, 9H,  $CMe_3$ ), 1.82 (s, 15H,  $C_5Me_5$ ), 3.79 (d of d, 1H, OCH<sub>2</sub> oxazoline, <sup>2</sup>J<sub>HH</sub> = 12 Hz, <sup>3</sup>J<sub>HH</sub> = 8 Hz), 4.36 (d of d, 1H, NCHPh oxazoline, <sup>3</sup>J<sub>HH</sub> = 10 Hz, 8 Hz), 4.91 (s, br, 1H, NH<sup>t</sup>Bu), 5.48 (d of d, 1H, OCH<sub>2</sub> oxazoline, <sup>2</sup>J<sub>HH</sub> = 12 Hz, <sup>3</sup>J<sub>HH</sub> = 10 Hz), 6.56 (d, 1H, Ar C-H, <sup>3</sup>J<sub>HH</sub> = 8 Hz), 7.12 (t, 1H, Ar C-H, <sup>3</sup>J<sub>HH</sub> = 8 Hz), 7.24 (t, 1H, Ar C-H, <sup>3</sup>J<sub>HH</sub> = 8 Hz), 7.80 (d, 1H, Ar C-H, <sup>4</sup>J<sub>HH</sub> = 2 Hz), 7.99 (d, 1H, Ar C-H, <sup>4</sup>J<sub>HH</sub> = 2 Hz), 8.04 (d, 1H, Ar C-H, <sup>3</sup>J<sub>HH</sub> = 8 Hz). <sup>13</sup>C{<sup>1</sup>H} NMR (100.6 MHz, C<sub>6</sub>D<sub>6</sub>, 298 K):  $\delta$  11.7 ppm ( $C_5Me_5$ ), 31.6, 31.7, 33.0 (all  $CMe_3$ ), 34.3, 36.2 (both  $CMe_3$ ), 55.1 (NH $CMe_3$ ), 74.0 (OCH<sub>2</sub> oxazoline), 74.6 (NCHPh oxazoline), 112.2 (Ar C<sub>q</sub>), 118.9 ( $C_5Me_5$ ), 121.5 (Ar C-H of metallated Ph), 123.5 (Ar C-H), 125.3, 126.1 (both Ar C-H of metallated Ph), 130.6 (Ar

C-H), 138.5, 139.9 (both Ar  $C_q$ ), 143.5 (Ar C-H of metallated Ph), 150.8, 164.5 (both Ar  $C_q$ ), 168.9 ( $C_q$  oxazoline), 188.4 (Zr- $C_{Ar}$ ). Anal. Calcd for  $C_{37}H_{52}N_2O_2Zr$ : C, 68.57; H, 8.09; N, 4.32. Found: C, 68.00; H, 7.85; N, 3.94. MS (EI +ve):  $m/z$  646 [ $M^+$ ], 631 [ $M^+$ -Me], 574 [ $M^+$  -  $NH^tBu$ ].

**( $S_{Zr}, S_C$ )-[Cp\* $L^{2'}$ Zr( $NH^tBu$ )] 4.** An NMR tube fitted with J. Young concentric stopcock was charged with Cp\*Zr( $NH^tBu$ )<sub>3</sub> (20.0 mg, 45.2  $\mu$ mol) and ( $S$ )-HL<sup>2</sup> (15.0 mg, 45.2  $\mu$ mol). Toluene- $d_8$  (0.4 mL) was added and the yellow solution heated to 110°C for 36 hours whereupon the reaction vessel was allowed to cool to ambient temperature. The compound was characterised by NMR spectroscopy. <sup>1</sup>H NMR (400 MHz, C<sub>6</sub>D<sub>6</sub>, 298 K):  $\delta$  0.35 ppm (d, 1H, Zr-CH<sub>2</sub>CMe<sub>2</sub>, <sup>2</sup> $J_{HH}$  = 14 Hz), 0.67 (s, 3H, Zr-CH<sub>2</sub>CMe<sub>2</sub>), 0.68 (s, 3H, Zr-CH<sub>2</sub>CMe<sub>2</sub>), 1.30 (s, 9H, CMe<sub>3</sub>), 1.41 (m, 10H, CMe<sub>3</sub> and CH<sub>2</sub>CMe<sub>2</sub>, overlapping), 1.68 (s, 9H, NHCMe<sub>3</sub>), 1.85 (s, 15H, C<sub>5</sub>Me<sub>5</sub>), 3.80-3.93 (m, 3H, NCHCMe<sub>2</sub> and OCH<sub>2</sub> oxazoline, overlapping), 4.55 (s, 1H, NHCMe<sub>3</sub>), 7.73 (d, 1H, Ar C-H, <sup>4</sup> $J_{HH}$  = 2 Hz), 7.94 (d, 1H, Ar C-H, <sup>4</sup> $J_{HH}$  = 2 Hz). <sup>13</sup>C{<sup>1</sup>H} NMR (100.6 MHz, C<sub>6</sub>D<sub>6</sub>, 298 K):  $\delta$  11.8 ppm (C<sub>5</sub>Me<sub>5</sub>), 23.5, 25.7 (both Zr CH<sub>2</sub>CMe<sub>2</sub>), 31.2, 31.6, 33.4 (all CMe<sub>3</sub>), 34.4, 36.1, 43.7 (all CMe<sub>3</sub>), 54.8 (Zr-CH<sub>2</sub>CMe<sub>2</sub>), 68.3 (OCH<sub>2</sub> oxazoline), 78.0 (NCHMe<sub>2</sub> oxazoline), 112.1 (Ar  $C_q$ ), 117.6 (C<sub>5</sub>Me<sub>5</sub>), 123.4, 130.0 (both Ar C-H), 138.6, 139.9, 163.9 (all Ar  $C_q$ ), 166.1 (oxazoline  $C_q$ ).

**( $S_{Zr}, S_C$ )-[Cp\* $L^1$ Zr( $NH^tBu$ )] [B(C<sub>6</sub>F<sub>5</sub>)<sub>4</sub>] 5.** In the glovebox, a 2 mL sample vial was charged with **3** (29.1 mg, 45  $\mu$ mol). C<sub>6</sub>D<sub>5</sub>Br (0.2 mL) was added. In a separate vial, [HNMe<sub>2</sub>Ph][B(C<sub>6</sub>F<sub>5</sub>)<sub>4</sub>] (40.0 mg, 50  $\mu$ mol, 1.1 equivalents) was slurried in C<sub>6</sub>D<sub>5</sub>Br (0.2

mL). The Zr complex solution was added to the borate slurry, resulting in the dissolution of the borate reagent. The reaction was monitored by  $^1\text{H}$  NMR spectroscopy and judged to be complete after *ca.* 3h at ambient temperature. The compound was monitored by  $^1\text{H}$  NMR spectroscopy at regular intervals to assess stability and found to be stable for several days at room temperature. A colour change to blue/turquoise/green was often observed, with no discernable effect on spectroscopic properties.  $^1\text{H}$  NMR (400 MHz,  $\text{C}_6\text{D}_5\text{Br}$ , 298 K):  $\delta$  0.52 ppm (s, 9H,  $\text{CMe}_3$ ), 1.31 (s, 9H,  $\text{CMe}_3$ ), 1.33 (s, 9H,  $\text{CMe}_3$ ), 1.73 (s, 15H,  $\text{C}_5\text{Me}_5$ ), 4.36 (d of d, 1H,  $\text{OCH}_2$  oxazoline,  $^2J_{\text{HH}} = 9$  Hz,  $^3J_{\text{HH}} = 5$  Hz), 4.54 (t, 1H,  $\text{OCH}_2$  oxazoline,  $^2J_{\text{HH}} = 9$  Hz), 4.83 (d of d, 1H,  $\text{NCHPh}$  oxazoline,  $^3J_{\text{HH}} = 9$  Hz, 5 Hz), 6.78 (s, br, 1H,  $\text{NHCMe}_3$ ), 7.06-7.19 (m, 5H, Ar C-H of Ph), 7.85 (d, 1H, Ar C-H,  $^4J_{\text{HH}} = 3$  Hz), 8.17 (d, 1H, Ar C-H,  $^4J_{\text{HH}} = 3$  Hz).  $^{13}\text{C}\{^1\text{H}\}$  NMR (100.6 MHz,  $\text{C}_6\text{D}_5\text{Br}$ , 298 K):  $\delta$  10.5 ppm ( $\text{C}_5\text{Me}_5$ ), 29.9, 30.9, 32.1 (all  $\text{CMe}_3$ ), 34.5, 35.2, 56.6 (all  $\text{CMe}_3$ ), 67.7 ( $\text{NCHPh}$  oxazoline), 76.5 ( $\text{OCH}_2$  oxazoline), 111.4 ( $\text{C}_5\text{Me}_5$ ), 118.9 (Ar  $\text{C}_q$ ) 129.2, 129.8 (both Ar C-H), 134.0, 138.8, 144.8, 159.7 (all Ar  $\text{C}_q$ ), 171.8 (oxazoline  $\text{C}_q$ ).  $^{19}\text{F}\{^1\text{H}\}$  NMR (282.4 MHz,  $\text{C}_6\text{D}_5\text{Br}$ , 298 K):  $\delta$  -131.6 ppm (d, *o*-F), -161.7 (t, *m*-F), -165.7 (t, *p*-F).

**( $\text{S}_{\text{Zr}}, \text{S}_{\text{C}}$ )-[Cp\* $\text{L}^2\text{Zr}(\text{NH}^i\text{Bu})][\text{B}(\text{C}_6\text{F}_5)_4]$  6.** The metallated complex **4** was prepared as described above. The solvent was removed *in vacuo* and replaced with  $\text{C}_6\text{D}_5\text{Br}$ , before addition to 1 equivalent of  $[\text{HNMe}_2\text{Ph}][\text{B}(\text{C}_6\text{F}_5)_4]$  (as a slurry in  $\text{C}_6\text{D}_5\text{Br}$ ). Conversion to the cation was monitored by NMR spectroscopy and judged to be complete after *ca.* 3 h.  $^1\text{H}$  NMR (400 MHz,  $\text{C}_6\text{D}_5\text{Br}$ , 298 K):  $\delta$  0.57 ppm (s, 9H,  $\text{CMe}_3$ ), 1.00 (s, 9H,  $\text{CMe}_3$ ), 1.27 (s, 9H,  $\text{CMe}_3$ ), 1.35 (s, 9H,  $\text{CMe}_3$ ), 1.72 (s, 15H,  $\text{C}_5\text{Me}_5$ ), 3.75 (d of d, 1H,  $\text{NCH}^i\text{Bu}$  oxazoline,  $^3J_{\text{HH}} = 10, 5$  Hz), 4.16 (t, 1H  $\text{OCH}_2$  oxazoline,  $^3J_{\text{HH}} = 5$  Hz), 4.36 (d of d, 1H,

OCH<sub>2</sub> oxazoline, <sup>3</sup>J<sub>HH</sub> = 10, 5 Hz), 6.64 (s, br, 1H NHCMe<sub>3</sub>), 7.81 (d, 1H, Ar C-H, <sup>4</sup>J<sub>HH</sub> = 2 Hz), 8.04 (d, 1H, Ar C-H, <sup>4</sup>J<sub>HH</sub> = 2 Hz). <sup>13</sup>C{<sup>1</sup>H} NMR (100.6 MHz, C<sub>6</sub>D<sub>5</sub>Br, 298 K): δ 10.8 ppm (C<sub>5</sub>Me<sub>5</sub>), 25.1, 30.2, 30.9, 32.4 (all CMe<sub>3</sub>), 33.7, 34.4, 35.2 (all CMe<sub>3</sub>), 57.6 (NHCMe<sub>3</sub>), 70.0 (NCH<sup>t</sup>Bu oxazoline), 74.9 (OCH<sub>2</sub> oxazoline), 113.1 (C<sub>5</sub>Me<sub>5</sub>), 123.6 (Ar C<sub>q</sub>), 129.2, 133.8 (both Ar C-H), 138.5, 144.8, 159.1 (all Ar C<sub>q</sub>), 173.6 (oxazoline C<sub>q</sub>). <sup>19</sup>F{<sup>1</sup>H} NMR (282.4 MHz, C<sub>6</sub>D<sub>5</sub>Br, 298 K): δ -131.3 ppm (d, *o*-F), -161.5 (t, *m*-F), -165.4 (t, *p*-F).

**Cp\*<sup>1</sup>ZrCl(NMe<sub>2</sub>) 7.** In the glovebox, a vial was charged with Cp\*ZrL<sup>1</sup>Cl<sub>2</sub> (20.0 mg, 31.0 μmol) and LiNMe<sub>2</sub> (1.6 mg, 31.0 μmol). C<sub>6</sub>D<sub>6</sub> was added and the yellow suspension transferred to a J. Young NMR tube and allowed to stand overnight, yielding a clear yellow solution. The sample was characterised by NMR spectroscopy. <sup>1</sup>H NMR (400 MHz, C<sub>6</sub>D<sub>6</sub>, 298 K): (major isomer only) δ 1.47 ppm (s, 9H, CMe<sub>3</sub>), 1.78 (s, 6H, Zr-NMe<sub>2</sub>), 1.85 (s, 15H, C<sub>5</sub>Me<sub>5</sub>), 1.95 (s, 9H, CMe<sub>3</sub>), 3.93 (d of d, 1H, OCH<sub>2</sub> oxazoline, <sup>2</sup>J<sub>HH</sub> = 8 Hz, <sup>3</sup>J<sub>HH</sub> = 2 Hz), 4.25 (t, 1H, OCH<sub>2</sub> oxazoline, <sup>2</sup>J<sub>HH</sub> = 8 Hz), 5.12 (d of d, 1H, NCHPh oxazoline, <sup>3</sup>J<sub>HH</sub> = 8, 2 Hz), 7.00 (m, 5H, Ar C-H of Ph), 7.92 (d, 1H, Ar C-H, <sup>4</sup>J<sub>HH</sub> = 2 Hz), 8.28 (d, 1H, Ar C-H, <sup>4</sup>J<sub>HH</sub> = 2 Hz). <sup>13</sup>C{<sup>1</sup>H} NMR (100.6 MHz, C<sub>6</sub>D<sub>6</sub>, 298 K): (major isomer only) δ 11.5 ppm (C<sub>5</sub>Me<sub>5</sub>), 31.1 (CMe<sub>3</sub>), 31.6 (br, Zr-NMe<sub>2</sub>), 31.7 (CMe<sub>3</sub>), 35.8, 36.1 (both CMe<sub>3</sub>), 68.3 (NCHPh oxazoline), 70.9 (OCH<sub>2</sub> oxazoline), 111.6 (Ar C<sub>q</sub>), 118.8 (C<sub>5</sub>Me<sub>5</sub>), 123.4 (Ar C-H of Ph), 126.7 (Ar C-H), 128.9 (Ar C-H of Ph), 129.3 (Ar C-H), 130.7 (Ar C-H of Ph), 138.2, 140.8, 143.1, 165.9 (all Ar C<sub>q</sub>), 171.7 (oxazoline C<sub>q</sub>).



From the NMR spectra in Figure S1 it is apparent that no starting material  $\text{Cp}^*\text{L}^1\text{ZrCl}_2$  is present in the product mixture, and neither is any diamido catalyst  $\text{Cp}^*\text{L}^1\text{Zr}(\text{NMe}_2)_2$  **1** produced. Two sets of peaks in the ratio 2.3:1 for the mixed amide/chloride are assigned to the diastereomers **7(a)** and **(b)**. On the basis that the most sterically accessible site for substitution is that adjacent to the oxazoline unit, the predominant diastereomer is expected to be **(a)**.

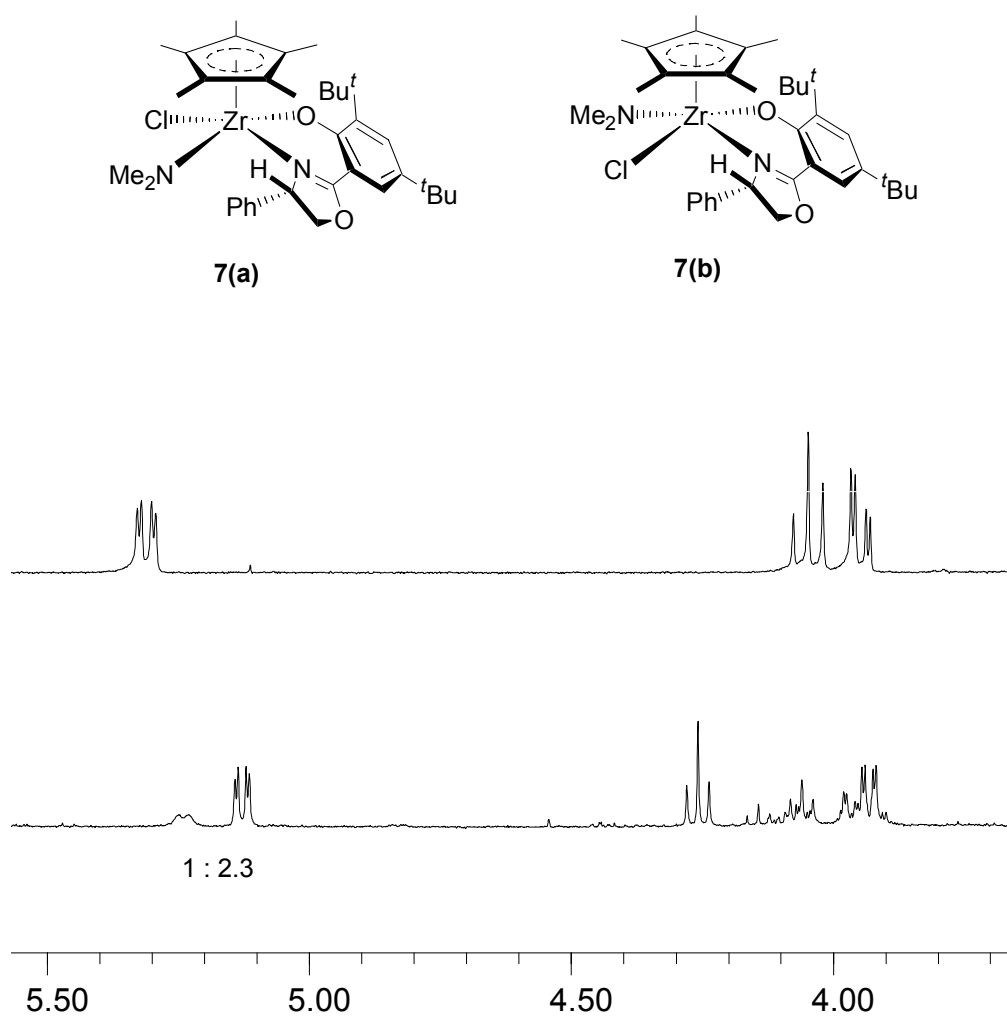

Figure S1.  $^1\text{H}$  NMR spectra of oxazoline region of  $\text{Cp}^*\text{L}^1\text{ZrCl}_2$  (upper) and diastereomers  $\text{Cp}^*\text{L}^1\text{ZrCl}(\text{NMe}_2)$  (lower).

**L<sup>1</sup><sub>2</sub>Zr(NMe<sub>2</sub>)<sub>2</sub> 8.** A J. Young NMR tube was charged with Zr(NMe<sub>2</sub>)<sub>4</sub> (7.6 mg, 28.5 μmol) and (*S*)-HL<sup>1</sup> (20.0 mg, 56.9 μmol). C<sub>6</sub>D<sub>6</sub> (0.4 mL) was added, and the sample immediately characterised by NMR spectroscopy. For similar compounds, see ref. 1. <sup>1</sup>H NMR (400 MHz, C<sub>6</sub>D<sub>6</sub>, 298 K): δ 1.37 ppm (s, 18H, 2 x CMe<sub>3</sub>), 1.62 (s, 18H, 2 x CMe<sub>3</sub>), 3.00 (s, 12H, 2 x Zr-NMe<sub>2</sub>), 3.70 (m, 4H, 2 x OCH<sub>2</sub> oxazoline, overlapping), 4.80 (d of d, 2H, NCHPh of oxazoline, <sup>3</sup>J<sub>HH</sub> = 9 Hz, 5 Hz), 6.87 (m, 4H, 2 x *o*-Ar C-H of Ph), 6.95 (m, 6H, 2 x *m*- and *p*-Ar C-H of Ph), 7.86 (d, 2H, 2 x Ar C-H, <sup>4</sup>J<sub>HH</sub> = 2 Hz), 8.20 (d, 2H, 2 x Ar C-H, <sup>4</sup>J<sub>HH</sub> = 2 Hz). <sup>13</sup>C{<sup>1</sup>H} NMR (100.6 MHz, C<sub>6</sub>D<sub>6</sub>, 298 K): δ 30.2, 31.7 ppm (both CMe<sub>3</sub>), 34.5, 36.0 (both CMe<sub>3</sub>), 45.0 (Zr-NMe<sub>2</sub>), 68.7 (NCHPh oxazoline), 74.4 (OCH<sub>2</sub> oxazoline), 113.4 (Ar C<sub>q</sub>), 123.6, 126.6, 127.7, 128.4, 130.2 (all Ar C-H), 139.0, 140.5, 141.3, 162.2 (all Ar C<sub>q</sub>), 168.9 (C<sub>q</sub> oxazoline).

**Hydroamination Procedure.** In the glovebox, a 2 mL sample vial was charged with the appropriate catalyst **1/2** (15 μmol). A second vial was charged with the appropriate substrate (150 μmol). Toluene-*d*<sub>8</sub> (0.2 mL) was added to each vial and the contents mixed for 5 minutes before transfer to a J. Young NMR tube. The initial room temperature <sup>1</sup>H NMR spectrum was recorded and the sample then placed in a heating block at 110°C and the <sup>1</sup>H NMR spectrum recorded at regular intervals thereafter to accurately determine the time taken for complete conversion.

**Determination of Enantioselectivities.** Using the samples from the catalytic reactions described above, the volatile contents of the NMR tube were transferred to a small Rotafluo/Young's reaction ampoule (containing a magnetic stirrer bar) by vacuum transfer.

Pentane (2 mL) and triethylamine (0.2 mL) were added. A separate vial was charged with a solution of (*R*)-(-)- $\alpha$ -methoxy- $\alpha$ -(trifluoromethyl)phenylacetyl chloride (1 equivalent based on the amount of catalysis substrate used) in pentane (1 mL). The solutions were mixed, with the almost immediate precipitation of a white solid, and the reaction stirred at ambient temperature for 3 hours. The suspension was then filtered through a glass pipette filled with Celite (*ca.* 2 cm depth) to remove insoluble material, and the filter-cake washed with pentane (5 mL). All volatiles were removed under high vacuum to yield the mixture of (*R,R*)- and (*R,S*)-Mosher amides as colourless solids. Enantioselectivities were determined by comparison of well resolved resonances in either the  $^1\text{H}$  NMR (25°C,  $\text{CDCl}_3$ ) or  $^{19}\text{F}$  NMR spectra (60°C) against racemic samples prepared using  $\text{Zr}(\text{NMe}_2)_4$  as catalyst.<sup>8</sup>

**Kinetic Studies.** The probe of a Bruker AC400 NMR spectrometer was pre-set to 90°C and the temperature confirmed by a calibrated thermocouple prior to the run. The kinetic samples were prepared according to the general hydroamination procedure described above, with the additional inclusion of an internal standard of ferrocene (purified by Soxhlet extraction in hexane prior to use). Spectra were recorded at an interval of 5 min. Data processing and calculation of turnover frequency ( $N_t, \text{h}^{-1}$ ) were performed according to the method of Marks and co-workers as described elsewhere.<sup>9</sup> Scatter in the measurements apparent at the start of each run, but particularly for the *N*-deuteriated substrate, is a result of an induction period during which time the diamido precatalyst fully releases  $\text{NMe}_2\text{H}$ .

Figure S2. Kinetic plot (90 °C) of [substrate] versus time for cyclisation of **I** and **I-d<sub>2</sub>**

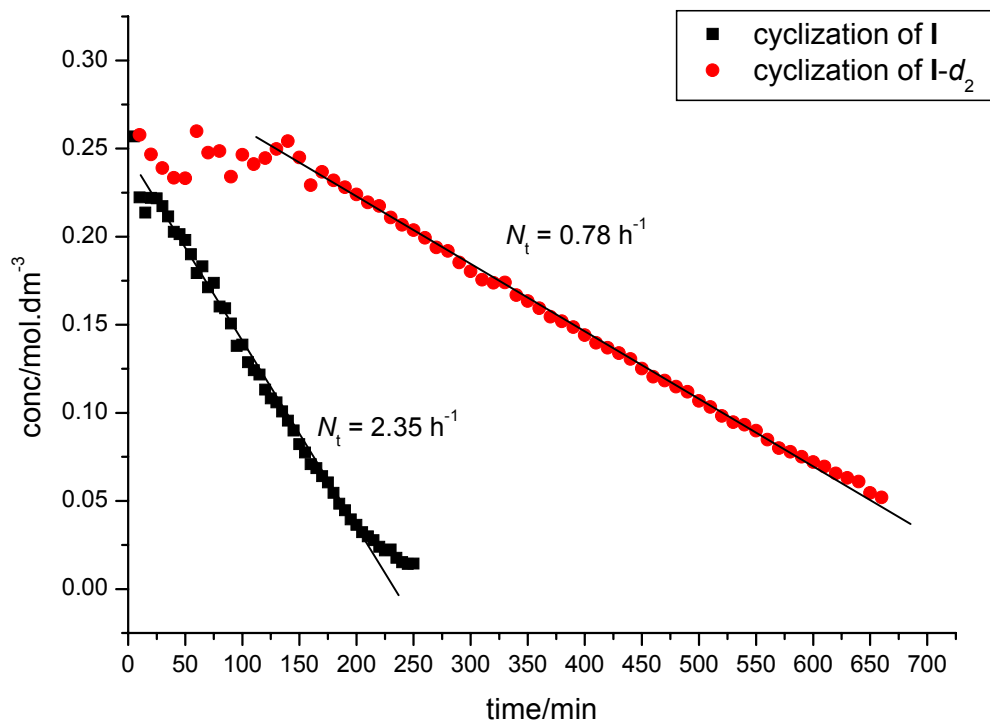

**X-ray Crystallography.** Colourless plates of **2** suitable for X-ray diffraction were grown from a saturated pentane solution at room temperature after prolonged standing. A suitable crystal was immersed in an inert oil prior to transfer to the cold nitrogen gas stream on a Siemens SMART CCD area detector diffractometer equipped with Mo-K $\alpha$  radiation ( $\lambda = 0.7107 \text{ \AA}$ ). Data were collected using narrow ( $0.3^\circ$  in  $\omega$ ) frame exposures, and intensities corrected using SADABS.<sup>10</sup> The structures were solved using direct methods via SHELXS<sup>11</sup> and refined using SHELXL.<sup>12</sup> All non-hydrogen atoms were refined anisotropically, and hydrogen atoms placed in calculated positions using a riding model (with free rotation for methyl groups). All H-atoms were assigned isotropic

thermal parameters  $1.2 \times$  ( $1.5 \times$  for methyl groups) the equivalent isotropic displacement parameter of the parent atom.

Figure S3. Molecular Structure of **2**. Displacement ellipsoids are at the 50% probability level. Second molecule of asymmetric unit and hydrogen atoms omitted for clarity.

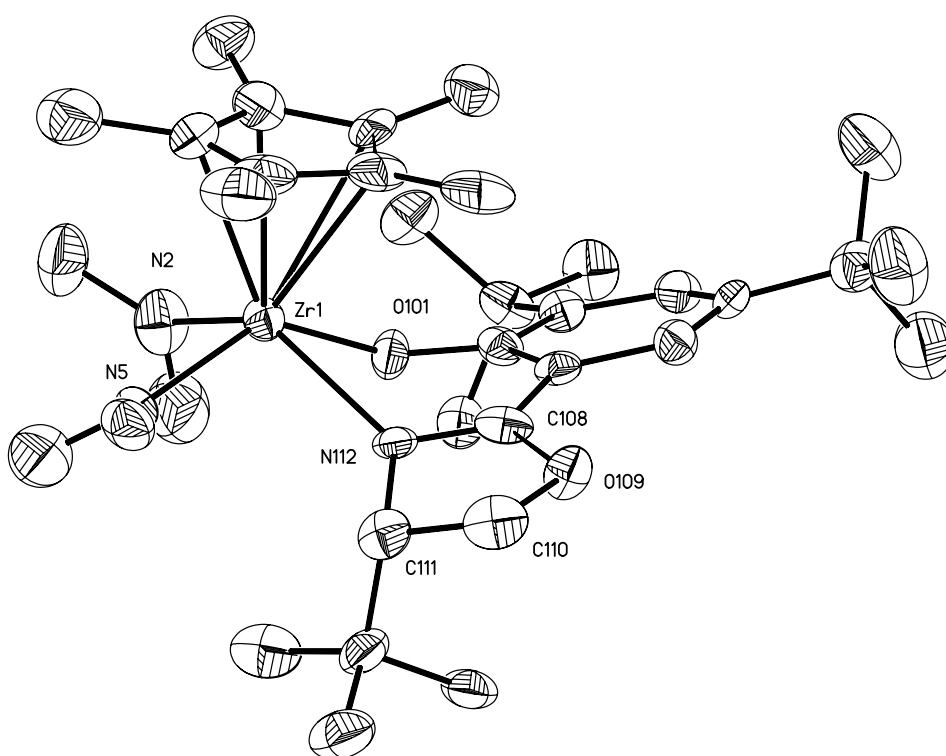

Table S1. Data collection and refinement parameters for **2**.

|                                                             |                                                                  |
|-------------------------------------------------------------|------------------------------------------------------------------|
|                                                             | Cp*Zr(L <sup>2</sup> )(NMe <sub>2</sub> ) <sub>2</sub> <b>2</b>  |
| formula                                                     | C <sub>35</sub> H <sub>59</sub> N <sub>3</sub> O <sub>2</sub> Zr |
| formula weight                                              | 645.07                                                           |
| crystal morphology                                          | colourless block                                                 |
| crystal dimensions/ mm                                      | 0.22 x 0.20 x 0.04                                               |
| crystal system                                              | monoclinic                                                       |
| space group                                                 | <i>P</i> 2 <sub>1</sub>                                          |
| <i>a</i> / Å                                                | 9.9465(7)                                                        |
| <i>b</i> / Å                                                | 9.9106(7)                                                        |
| <i>c</i> / Å                                                | 36.050(3)                                                        |
| $\alpha$ / °                                                | 90                                                               |
| $\beta$ / °                                                 | 95.098(2)                                                        |
| $\delta$ / °                                                | 90                                                               |
| <i>V</i> / Å <sup>3</sup>                                   | 3539.6(4)                                                        |
| <i>Z</i>                                                    | 4                                                                |
| <i>d</i> (calc)/ mg.m <sup>3</sup>                          | 1.211                                                            |
| $\mu$ (MoK $\alpha$ )/ mm <sup>-1</sup>                     | 0.343                                                            |
| T/K                                                         | 180 K                                                            |
| <i>F</i> <sub>000</sub>                                     | 1384                                                             |
| reflections measured                                        | 21778                                                            |
| unique reflections                                          | 9976 [ <i>R</i> (int) = 0.0631]                                  |
| <i>R</i> <sub>1</sub> [ <i>I</i> > 2 $\sigma$ ( <i>I</i> )] | 0.0804                                                           |
| w <i>R</i> <sub>2</sub>                                     | 0.1649                                                           |
| data/restraints/parameters                                  | 9976/ 55/ 776                                                    |
| goodness of fit on <i>F</i> <sup>2</sup>                    | 1.105                                                            |
| largest peak and hole/ e. Å <sup>3</sup>                    | 1.437 and -0.720                                                 |

Table S2. Selected Bond Lengths and Angles for **2**.

|                      | Length/Å  |                           | Length/Å  |
|----------------------|-----------|---------------------------|-----------|
| Zr(1)-N(2)           | 2.078(9)  | Zr(1)-N(5)                | 2.144(9)  |
| Zr(1)-O(101)         | 2.140(7)  | Zr(1)-N(112)              | 2.361(8)  |
| C(108)-N(112)        | 1.324(13) | C(108)-O(109)             | 1.339(12) |
| C(111)-N(112)        | 1.507(12) | C(110)-C(111)             | 1.535(15) |
| O(109)-C(110)        | 1.432(11) | O(101)-C(102)             | 1.319(11) |
| Zr(1)-C(301)         | 2.630(10) | Zr(1)-C(302)              | 2.667(10) |
| Zr(1)-C(303)         | 2.612(12) | Zr(1)-C(304)              | 2.532(11) |
| Zr(1)-C(305)         | 2.553(12) | Zr(1)-Cp* <sub>cent</sub> | 2.305     |
|                      |           |                           |           |
|                      | Angle/°   |                           | Angle/°   |
| N(2)-Zr(1)-N(5)      | 88.7(4)   | N(5)-Zr(1)-N(112)         | 87.3(3)   |
| O(101)-Zr(1)-N(112)  | 71.9(3)   | N(2)-Zr(1)-O(101)         | 82.0(3)   |
| C(108)-N(112)-Zr(1)  | 120.7(6)  | C(102)-O(101)-Zr(1)       | 131.3(6)  |
| N(112)-C(108)-O(109) | 115.1(8)  | C(108)-O(109)-C(110)      | 108.2(8)  |
| O(109)-C(110)-C(111) | 102.8(7)  | N(112)-C(111)-C(110)      | 101.5(8)  |
| C(108)-N(112)-C(111) | 105.3(8)  |                           |           |

## References

- 1 I. Westmoreland, I. J. Munslow, A. J. Clarke, G. Clarkson, R. J. Deeth, and P. Scott, *J. Organomet. Chem.*, 2006, **691**, 2228.
- 2 A. M. Irigoyen, A. Martin, M. Mena, F. Palacios, and C. Yelamos, *J. Organomet. Chem.*, 1995, **494**, 255.
- 3 H. Bai, H. W. Roesky, M. Noltemeyer, and M. Witt, *Chem. Ber.*, 1992, **125**, 825.
- 4 D. C. Bradley and I. M. Thomas, *J. Chem. Soc.*, 1960, 3857.
- 5 P. H. Martinez, K. C. Hultsch, and F. Hampel, *Chem. Commun.*, 2006, 2221.
- 6 P. D. Knight, I. Munslow, P. N. O'Shaughnessy, and P. Scott, *Chem. Commun.*, 2004, 894.
- 7 B. D. Stubbert and T. J. Marks, *J. Am. Chem. Soc.*, 2007, **129**, 6149.
- 8 J. A. Bexrud, J. D. Beard, D. C. Leitch, and L. L. Schafer, *Org. Lett.*, 2005, **7**, 1959.
- 9 M. R. Gagne, C. L. Stern, and T. J. Marks, *J. Am. Chem. Soc.*, 1992, **114**, 275.
- 10 G. M. Sheldrick, SADABS, *Program for Area Detector Absorption Correction*, 1996.
- 11 G. M. Sheldrick, *Acta. Crystallogr.*, 1990, **A46**, 467.
- 12 G. M. Sheldrick, Madison, WI, 1997.
